# Supplementary material for: The Role of Hydrogen for Sulfurimonas denitrificans’ Metabolism
Source: PubMed Central journal article supplement (PMC4149538; doi:10.1371/journal.pone.0106218), 2014-08-29
Supplement: pone.0106218.s001.pdf [file pone.0106218.s001.pdf]

1 **Supplementary Information**

2 **Table S1: Growth properties and significant differences in distinct culture experiments.**

3 *S. denitrificans* were incubated under different conditions as listed in Figure 1. For selected

4 time points p-values were calculated using the student's t-test.

---

|  |                                                                |                                                                |                                                                |
|--|----------------------------------------------------------------|----------------------------------------------------------------|----------------------------------------------------------------|
|  | + H <sub>2</sub> + S <sub>2</sub> O <sub>3</sub> <sup>2-</sup> | + H <sub>2</sub> - S <sub>2</sub> O <sub>3</sub> <sup>2-</sup> | + H <sub>2</sub> + S <sub>2</sub> O <sub>3</sub> <sup>2-</sup> |
|  | compared with                                                  | compared with                                                  | compared with                                                  |
|  | + H <sub>2</sub> - S <sub>2</sub> O <sub>3</sub> <sup>2-</sup> | + H <sub>2</sub> + S <sub>2</sub> O <sub>3</sub> <sup>2-</sup> | - H <sub>2</sub> + S <sub>2</sub> O <sub>3</sub> <sup>2-</sup> |

---

|                                 |                                       |                        |                               |
|---------------------------------|---------------------------------------|------------------------|-------------------------------|
| growth description<br>(p-value) | faster within first 3 days<br>(0.003) | denser overall (0.002) | faster and denser<br>(<0.001) |
|---------------------------------|---------------------------------------|------------------------|-------------------------------|

---

5

6
