# Supplementary material for: The Role of Hydrogen for Sulfurimonas denitrificans’ Metabolism
Source: PubMed Central journal article supplement (PMC4149538; doi:10.1371/journal.pone.0106218), 2014-08-29
Supplement: pone.0106218.s002.pdf [file pone.0106218.s002.pdf]

1 **Supplementary Information**

2 **Table S2: Significant differences of growth, hydrogen consumption and hydrogen**  
3 **uptake activity for cultures grown without thiosulfate (+ H<sub>2</sub> - S<sub>2</sub>O<sub>3</sub><sup>2-</sup>) and cultures grown**  
4 **with thiosulfate (+ H<sub>2</sub> + S<sub>2</sub>O<sub>3</sub><sup>2-</sup>).**

5 *S. denitrificans* were grown without thiosulfate (+ H<sub>2</sub> - S<sub>2</sub>O<sub>3</sub><sup>2-</sup>) and with thiosulfate (+ H<sub>2</sub> +  
6 S<sub>2</sub>O<sub>3</sub><sup>2-</sup>), the growth, H<sub>2</sub> consumption and H<sub>2</sub> uptake activity are shown in Figure 1, Figure 2  
7 and Figure 5, respectively. Statistics were performed using the student's t-test.

---

|                                                                | denser growth overall | higher H <sub>2</sub> consumption | higher H <sub>2</sub> uptake activity |
|----------------------------------------------------------------|-----------------------|-----------------------------------|---------------------------------------|
| + H <sub>2</sub> - S <sub>2</sub> O <sub>3</sub> <sup>2-</sup> | p-value 0.002         | p-value 0.001                     | p-value <0.001                        |
| compared with                                                  |                       |                                   |                                       |
| + H <sub>2</sub> + S <sub>2</sub> O <sub>3</sub> <sup>2-</sup> |                       |                                   |                                       |

---
